# Supplementary material
Source: PubMed Central journal article supplement (PMC2773915)
Supplement: supp_180_9_887__1.pdf [file supp_180_9_887__1.pdf]

**Underweight and Obesity are Associated with an Increased Risk of Death  
after Lung Transplantation**

David J. Lederer, Jessie S. Wilt, Frank D'Ovidio, Matthew Bacchetta, Lori Shah,  
Shankari Ravichandran, Jenny Lenoir, Brenda Klein, Joshua R. Sonett, Selim M. Arcasoy

**Online Data Supplement**

## Supplemental Methods

### *Statistical Analysis*

We used both Cox proportional hazards models and generalized additive models (GAMs) to examine the association between BMI and survival. GAMs incorporate smoothing functions to allow non-linear associations between each continuous dependent variable and the independent variable (E1). Our GAMs were logistic regression models (binary regression with a logit link) with the outcomes of death at 1 year (early mortality) and death at 5 years conditional on 1 year survival (late mortality). These models incorporated local regression (loess) smoothing functions for all continuous variables, including BMI as shown in Figure 3.

### *Multiple imputation*

Missing data and the approach to handling missing data can lead to biased effect estimates and incorrectly estimated standard errors. In our study, we used multiple imputation to handle missing covariate data, an approach that accounts for the uncertainty of the “right” value to impute for missing data (E2, E3). This method has been shown to minimize bias compared to alternative methods (E4). We used a Markov Chain Monte Carlo method to impute five plausible values for each missing value in all of our survival models (E5), as previously implemented in analyses of UNOS/OPTN data (E6, E7).

## Supplemental References

- E1. Hastie TJ, Tibshirani RJ. Generalized Additive Models. London: Chapman & Hall; 1990.
- E2. Rubin DB, Schenker N. Multiple imputation in health-care databases: an overview and some applications. *Stat Med* 1991;10:585-598.
- E3. Rubin DB. Inference and missing data. *Biometrika* 1976;63:581-592.
- E4. van der Heijden GJ, Donders AR, Stijnen T, Moons KG. Imputation of missing values is superior to complete case analysis and the missing-indicator method in multivariable diagnostic research: a clinical example. *J Clin Epidemiol* 2006;59:1102-1109.
- E5. Schafer JL. *Analysis of Incomplete Multivariate Data*. New York: Chapman and Hall; 1997.
- E6. Lederer DJ, Benn EK, Barr RG, Wilt JS, Reilly G, Sonett JR, Arcasoy SM, Kawut SM. Racial differences in waiting list outcomes in chronic obstructive pulmonary disease. *Am J Respir Crit Care Med* 2008;177:450-454.
- E7. Thabut G, Ravaud P, Christie JD, Castier Y, Fournier M, Mal H, Leseche G, Porcher R. Determinants of the survival benefit of lung transplantation in patients with chronic obstructive pulmonary disease. *Am J Respir Crit Care Med* 2008;177:1156-1163.

Figure E1: Unadjusted Survival after lung transplantation

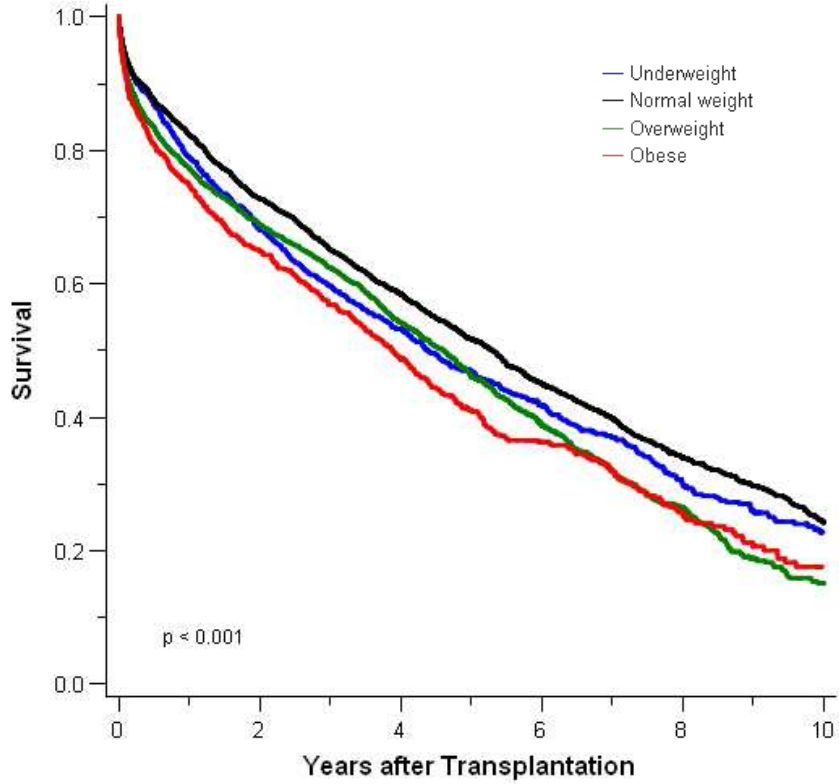

|               |      |      |      |     |     |     |
|---------------|------|------|------|-----|-----|-----|
| Underweight   | 862  | 583  | 445  | 272 | 136 | 49  |
| Normal weight | 2864 | 2056 | 1586 | 906 | 451 | 181 |
| Overweight    | 1644 | 1117 | 840  | 412 | 173 | 50  |
| Obese         | 608  | 393  | 280  | 151 | 66  | 23  |

**Figure E2: Continuous relationships of body mass index and the risks of death at 1 year (A) and at 5 years conditional on 1 year survival (B) after lung transplantation for cystic fibrosis. Both curves are adjusted for the covariates listed in the footnote to Table 2 (Model 4)**

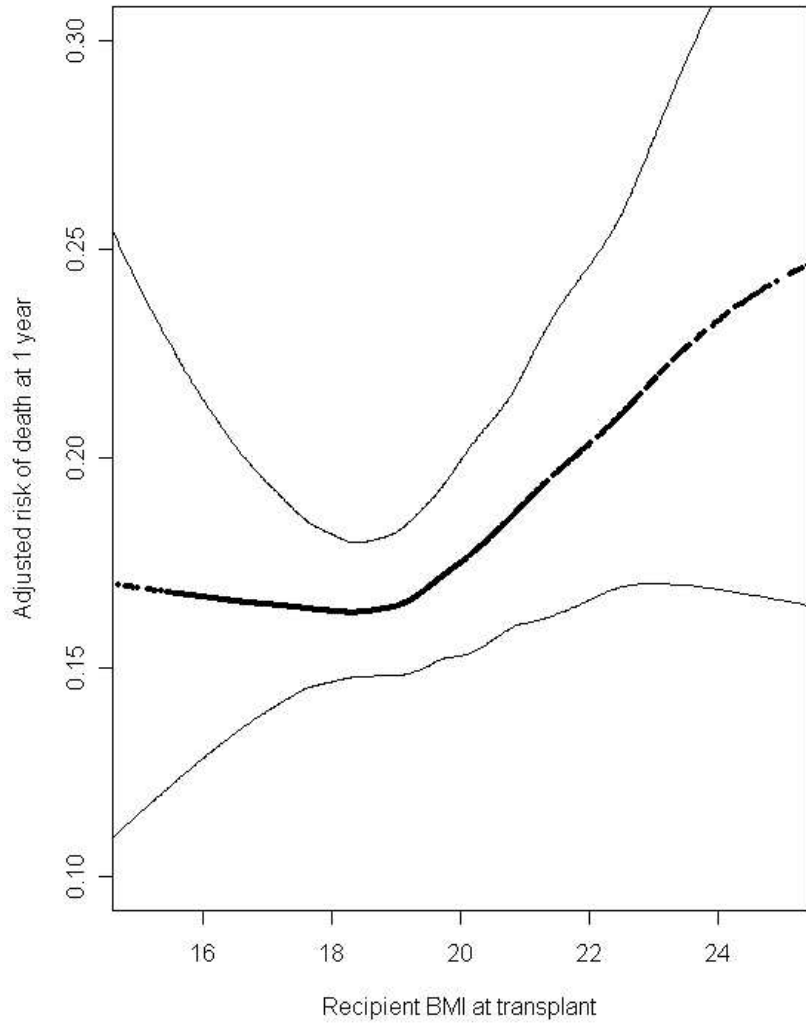**A**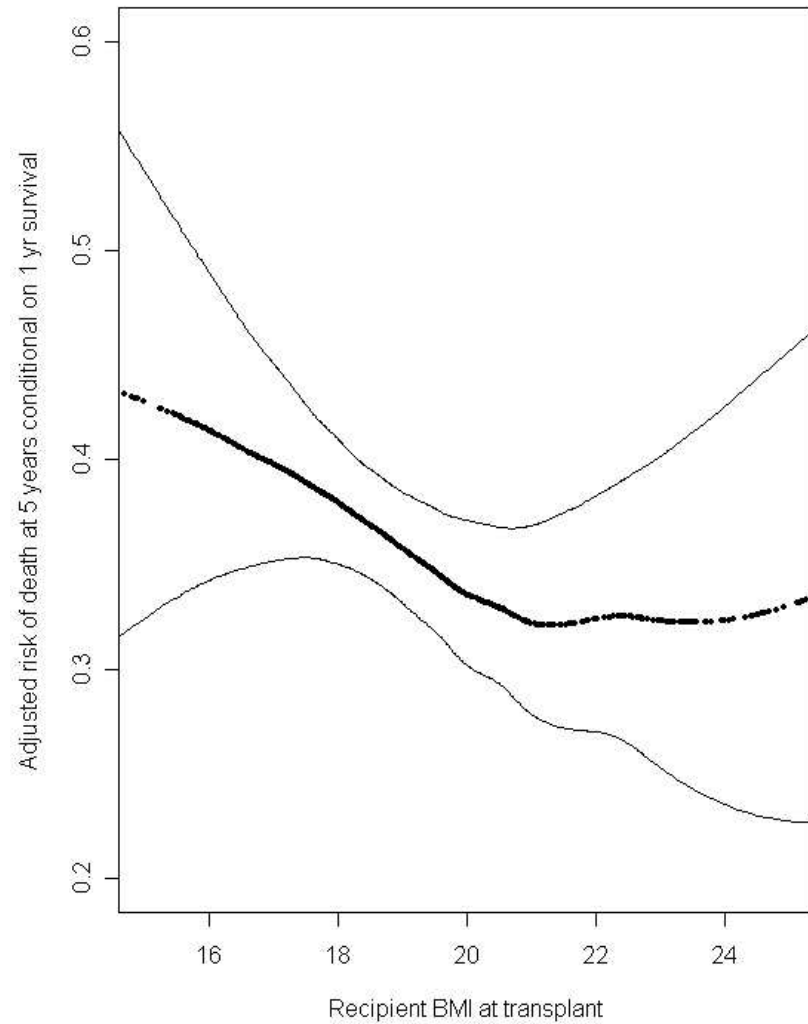**B**

Figure E3: Continuous relationships of body mass index and the risks of death at 1 year (A) and at 5 years conditional on 1 year survival (B) after lung transplantation for chronic obstructive pulmonary disease. Both curves are adjusted for the covariates listed in the footnote to Table 2 (Model 4)

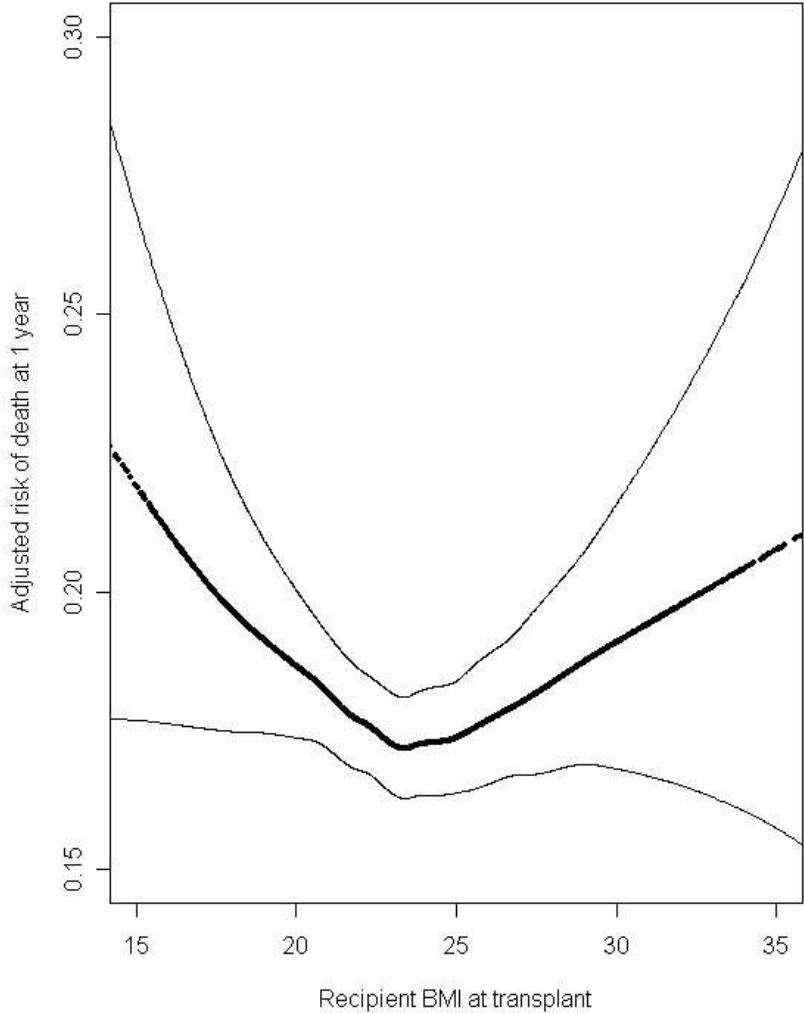

A

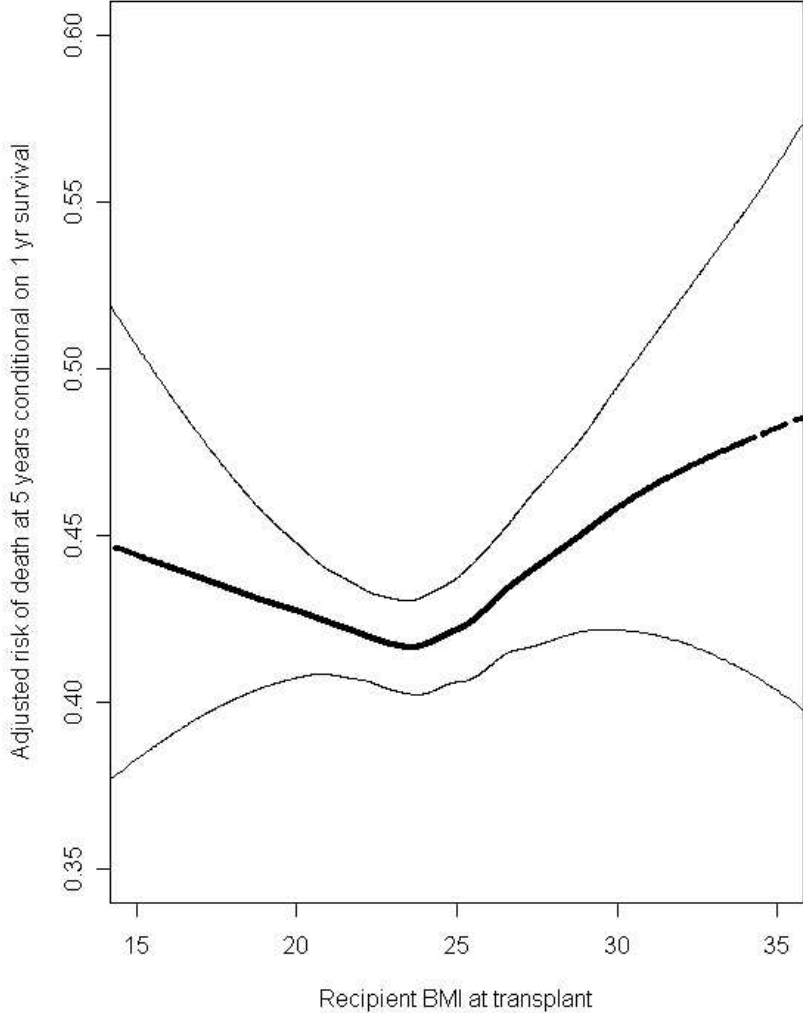

B

**Figure E4: Continuous relationships of body mass index and the risks of death at 1 year (A) and at 5 years conditional on 1 year survival (B) after lung transplantation for diffuse parenchymal lung disease. Both curves are adjusted for the covariates listed in the footnote to Table 2 (Model 4)**

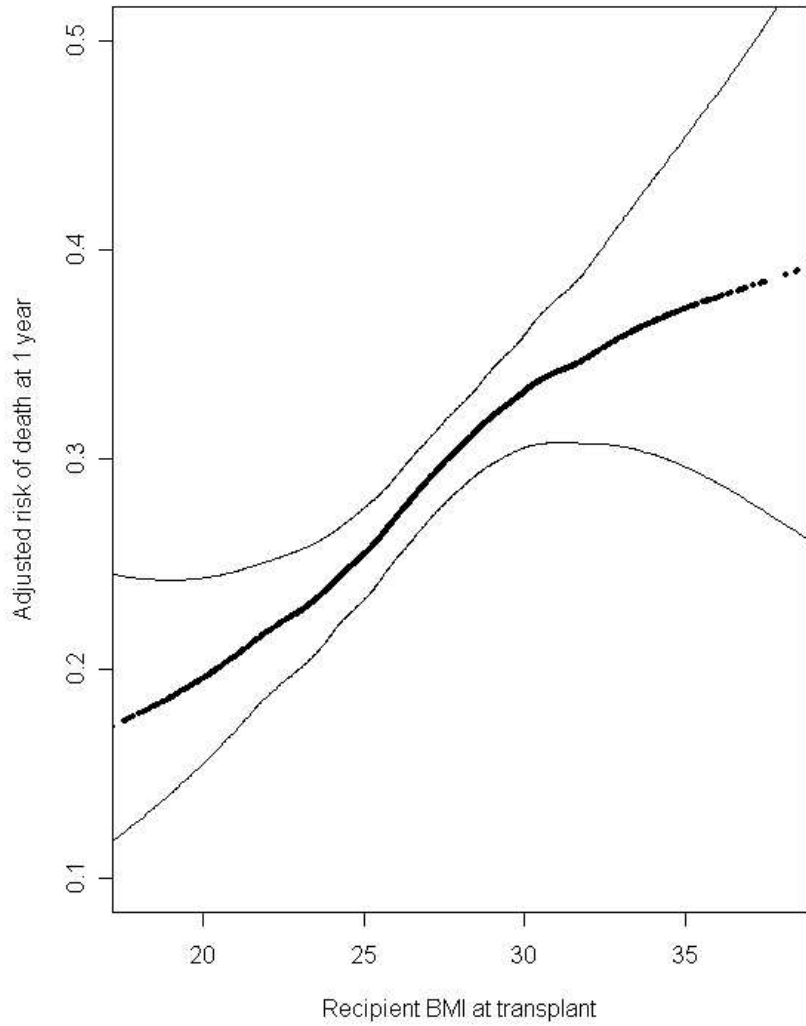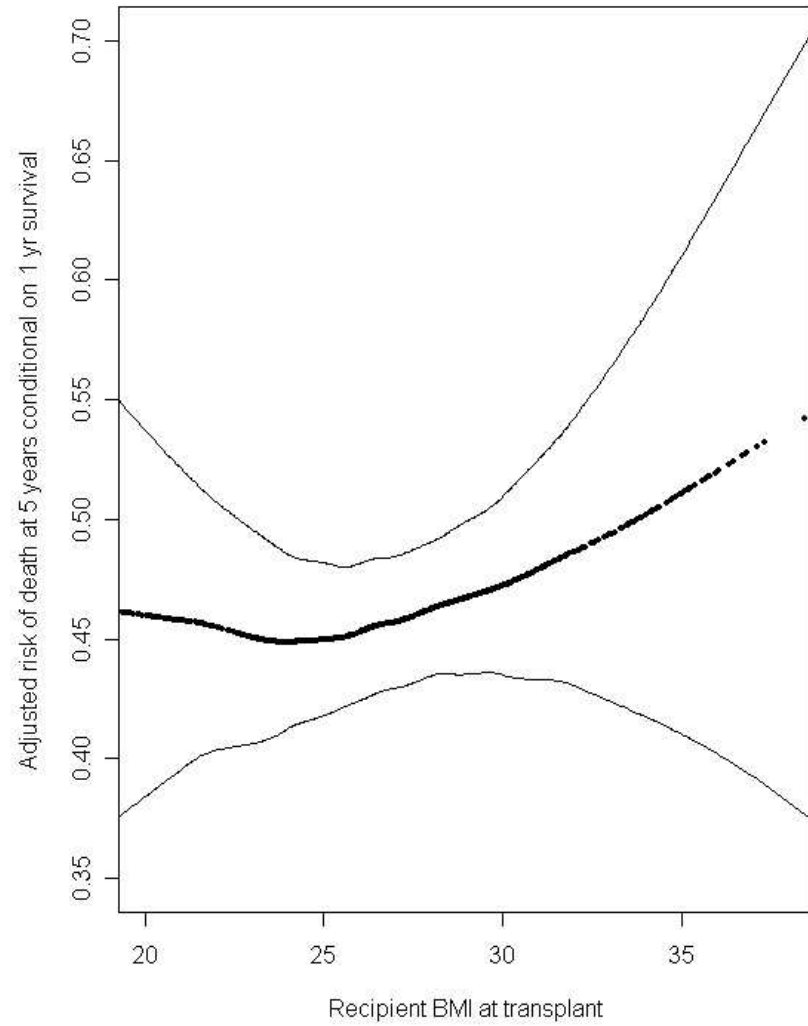

A

B

Table E1: Unadjusted cause-specific mortality rate ratios after lung transplantation

| Cause of Death                | Normal Weight |     | Underweight        |         | Overweight |                    |         | Obese |                    |         |
|-------------------------------|---------------|-----|--------------------|---------|------------|--------------------|---------|-------|--------------------|---------|
|                               | No.           | No. | RR (95% CI)        | p value | No.        | RR (95% CI)        | p value | No.   | RR (95% CI)        | p value |
| Alive                         | 1038          | 274 |                    |         | 507        |                    |         | 178   |                    |         |
| Primary graft failure         | 79            | 15  | 0.66 (0.37 – 1.12) | 0.13    | 62         | 1.54 (1.10 – 2.15) | 0.01    | 17    | 1.21 (0.69 – 1.99) | 0.49    |
| Respiratory failure           | 367           | 123 | 1.16 (0.95 – 1.42) | 0.15    | 196        | 1.05 (0.88 – 1.25) | 0.57    | 102   | 1.55 (1.24 – 1.93) | <0.001  |
| Chronic allograft dysfunction | 216           | 84  | 1.35 (1.04 – 1.73) | 0.02    | 131        | 1.19 (0.96 – 1.48) | 0.12    | 44    | 1.15 (0.81 – 1.56) | 0.43    |
| Infection                     | 427           | 161 | 1.31 (1.09 – 1.57) | 0.003   | 255        | 1.17 (1.00 – 1.37) | 0.045   | 109   | 1.43 (1.15 – 1.74) | 0.001   |
| Cardiac                       | 85            | 11  | 0.45 (0.23 – 0.82) | 0.007   | 62         | 1.43 (1.03 – 1.99) | 0.03    | 24    | 1.58 (0.98 – 2.45) | 0.06    |
| Cerebrovascular               | 47            | 14  | 1.04 (0.55 – 1.84) | 0.89    | 29         | 1.21 (0.76 – 1.92) | 0.42    | 8     | 0.97 (0.42 – 1.94) | 0.93    |
| Cancer                        | 130           | 33  | 0.88 (0.59 – 1.28) | 0.52    | 101        | 1.53 (1.17 – 1.98) | 0.002   | 40    | 1.72 (1.19 – 2.43) | 0.004   |
| Other                         | 475           | 147 | 1.07 (0.89 – 1.29) | 0.45    | 301        | 1.24 (1.07 – 1.44) | 0.003   | 86    | 1.01 (0.80 – 1.27) | 0.92    |
| <b>Cystic fibrosis</b>        |               |     |                    |         |            |                    |         |       |                    |         |
| Alive                         | 252           | 153 |                    |         |            |                    |         |       |                    |         |
| Primary graft failure         | 10            | 6   | 0.85 (0.28 – 2.33) | 0.76    |            |                    |         |       |                    |         |
| Respiratory failure           | 52            | 61  | 1.65 (1.14 – 2.40) | 0.008   |            |                    |         |       |                    |         |
| Chronic allograft dysfunction | 36            | 43  | 1.68 (1.08 – 2.63) | 0.02    |            |                    |         |       |                    |         |
| Infection                     | 67            | 72  | 1.51 (1.08 – 2.11) | 0.02    |            |                    |         |       |                    |         |
| Cardiac                       | 5             | 4   | 1.13 (0.27 – 4.44) | 0.86    |            |                    |         |       |                    |         |
| Cerebrovascular               | 10            | 6   | 0.85 (0.28 – 2.33) | 0.76    |            |                    |         |       |                    |         |
| Cancer                        | 14            | 6   | 0.61 (0.21 – 1.54) | 0.31    |            |                    |         |       |                    |         |
| Other                         | 73            | 59  | 1.14 (0.80 – 1.60) | 0.46    |            |                    |         |       |                    |         |



Table E1 – continued

**COPD**

|                               |     |     |                    |      |     |                    |       |    |                    |      |
|-------------------------------|-----|-----|--------------------|------|-----|--------------------|-------|----|--------------------|------|
| Alive                         | 650 | 111 |                    |      | 340 |                    |       | 84 |                    |      |
| Primary graft failure         | 61  | 9   | 0.76 (0.35 – 1.46) | 0.44 | 36  | 1.14 (0.75 – 1.72) | 0.53  | 11 | 1.30 (0.65 – 2.37) | 0.44 |
| Respiratory failure           | 276 | 55  | 1.02 (0.75 – 1.35) | 0.91 | 117 | 0.82 (0.66 – 1.02) | 0.07  | 52 | 1.35 (0.99 – 1.79) | 0.06 |
| Chronic allograft dysfunction | 153 | 35  | 1.17 (0.80 – 1.67) | 0.41 | 102 | 1.29 (1.00 – 1.66) | 0.048 | 28 | 1.31 (0.86 – 1.83) | 0.20 |
| Infection                     | 304 | 80  | 1.34 (1.04 – 1.71) | 0.02 | 158 | 1.01 (0.83 – 1.22) | 0.95  | 56 | 1.31 (0.98 – 1.73) | 0.07 |
| Cardiac                       | 69  | 7   | 0.53 (0.22 – 1.07) | 0.08 | 43  | 1.21 (0.82 – 1.76) | 0.34  | 9  | 0.94 (0.44 – 1.79) | 0.87 |
| Cerebrovascular               | 28  | 7   | 1.30 (0.52 – 2.82) | 0.55 | 19  | 1.32 (0.72 – 2.35) | 0.36  | 3  | 0.80 (0.18 – 2.26) | 0.71 |
| Cancer                        | 94  | 24  | 1.31 (0.82 – 2.01) | 0.26 | 55  | 1.13 (0.81 – 1.58) | 0.46  | 19 | 1.45 (0.86 – 2.32) | 0.16 |
| Other                         | 341 | 83  | 1.24 (0.97 – 1.57) | 0.08 | 208 | 1.18 (0.99 – 1.40) | 0.06  | 39 | 0.82 (0.58 – 1.12) | 0.22 |

**DPLD**

|                               |     |  |  |  |     |                    |       |    |                    |       |
|-------------------------------|-----|--|--|--|-----|--------------------|-------|----|--------------------|-------|
| Alive                         | 136 |  |  |  | 157 |                    |       | 93 |                    |       |
| Primary graft failure         | 8   |  |  |  | 26  | 2.58 (1.21 – 6.15) | 0.01  | 6  | 1.07 (0.34 – 3.13) | 0.90  |
| Respiratory failure           | 39  |  |  |  | 75  | 1.54 (1.05 – 2.30) | 0.03  | 49 | 1.78 (1.17 – 2.72) | 0.007 |
| Chronic allograft dysfunction | 27  |  |  |  | 25  | 0.93 (0.74 – 1.17) | 0.53  | 93 | 0.97 (0.74 – 1.26) | 0.81  |
| Infection                     | 56  |  |  |  | 89  | 1.28 (0.92 – 1.79) | 0.15  | 53 | 1.34 (0.92 – 1.95) | 0.13  |
| Cardiac                       | 27  |  |  |  | 25  | 0.75 (0.42 – 1.29) | 0.29  | 16 | 0.84 (0.44 – 1.55) | 0.59  |
| Cerebrovascular               | 9   |  |  |  | 9   | 0.80 (0.31 – 2.09) | 0.65  | 5  | 0.80 (0.24 – 2.35) | 0.69  |
| Cancer                        | 22  |  |  |  | 45  | 1.64 (0.99 – 2.78) | 0.053 | 21 | 1.35 (0.74 – 2.47) | 0.33  |
| Other                         | 61  |  |  |  | 87  | 1.15 (0.83 – 1.60) | 0.41  | 47 | 1.09 (0.74 – 1.60) | 0.65  |

---

RR = unadjusted rate ratio for death after lung transplantation, CI = confidence interval

Normal weight group is the referent group for all effect estimates.

**Table E2: Sensitivity Analyses: Multivariate adjusted hazard ratios for death after lung transplantation**

|                                                          | No.  | Body mass index category |               |            |       | p value |
|----------------------------------------------------------|------|--------------------------|---------------|------------|-------|---------|
|                                                          |      | Underweight              | Normal weight | Overweight | Obese |         |
| <b>All diagnoses</b>                                     | 7143 | 1.12*                    | 1.0           | 1.15†      | 1.20† | <0.001  |
| <b>PTSS instead of LAS</b>                               | 5978 | 1.15†                    | 1.0           | 1.14†      | 1.18† | <0.001  |
| <b>Including pediatric donors</b>                        | 6037 | 1.13*                    | 1.0           | 1.16†      | 1.22† | <0.001  |
| <b>All heights and weights</b>                           | 6238 | 1.15†                    | 1.0           | 1.15†      | 1.20† | <0.001  |
| <b>Adjustment for recipient:donor gender interaction</b> | 5978 | 1.15*                    | 1.0           | 1.16†      | 1.22† | <0.001  |

Effect estimates are hazards ratios from stratified Cox models adjusted for age, gender, height, donor characteristics (age, gender, height, body mass index, and smoking history > 20 packyears), lung allocation score, cardiovascular risk factors (hypertension, smoking status, diabetes), hospitalized at transplant, CMV mismatch, donor cause of death, HLA mismatch, use of steroids prior to transplant, and ischemic time. Cox models are stratified by diagnosis, transplant procedure and transplant year. P values are from likelihood ratio tests comparing a model containing variables for BMI categories to the model without BMI categories.

\* Wald test p < 0.05

† Wald test p < 0.01
